# Supplementary material for: Porcine alveolar macrophage CD163 abundance is a pivotal switch for porcine reproductive and respiratory syndrome virus infection
Source: PubMed Central journal article supplement (PMC5844737; doi:10.18632/oncotarget.24040), 2018-01-06
Supplement: oncotarget-09-12174-s001.pdf [file oncotarget-09-12174-s001.pdf]

# Porcine alveolar macrophage CD163 abundance is a pivotal switch for porcine reproductive and respiratory syndrome virus infection

## SUPPLEMENTARY MATERIALS

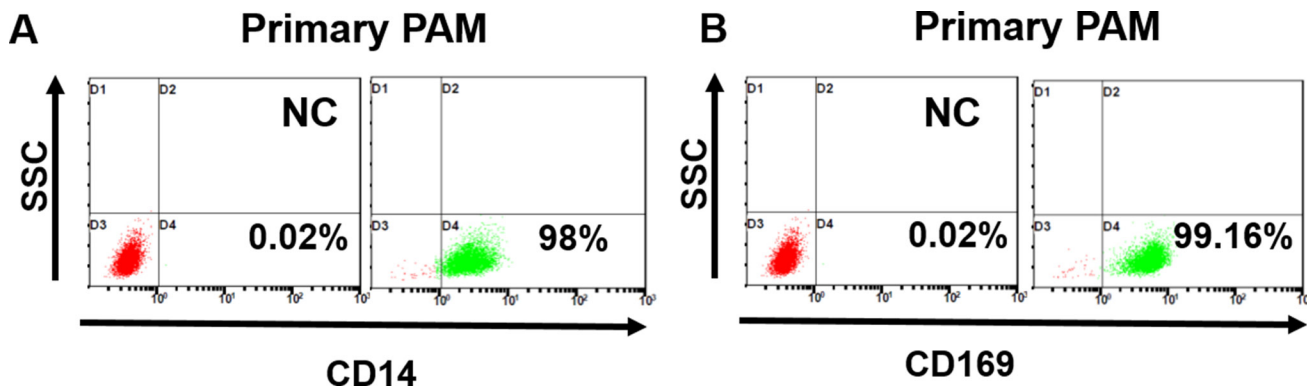

Supplementary Figure 1: Identification of primary PAM purification with indicated markers.

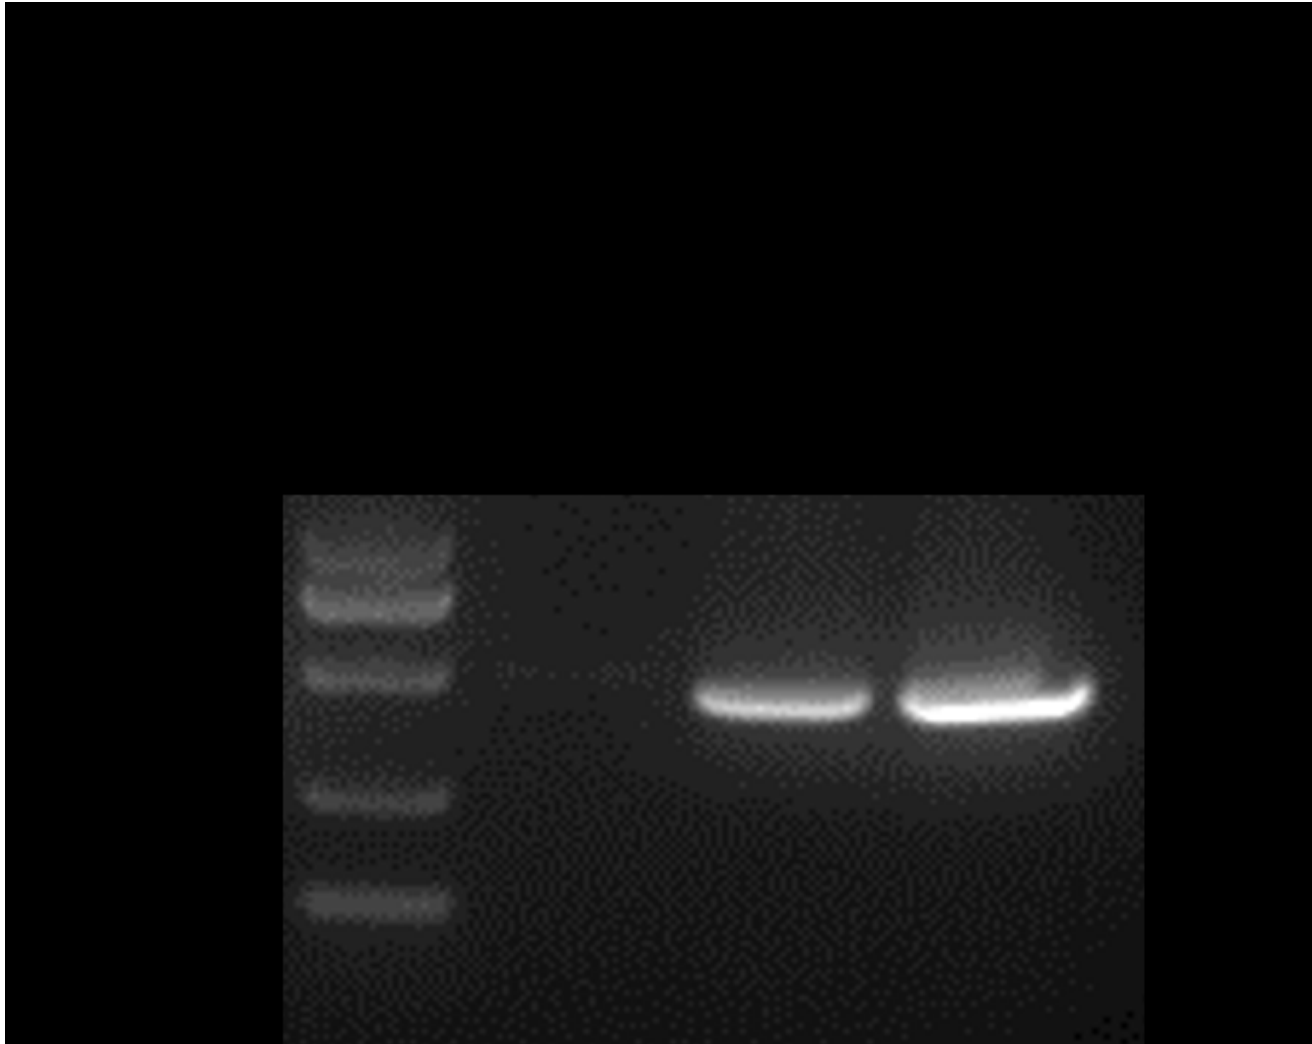

**Supplementary Figure 2: Infection of iPAMs by NADC30-like PRRSV strain.**
